# Supplementary material for: Immunoglobulin G subclass switching impacts sensitivity of an immunoassay targeting Francisella tularensis lipopolysaccharide
Source: PLoS One. 2018 Apr 9;13(4):e0195308. doi: 10.1371/journal.pone.0195308 (PMC5890998; doi:10.1371/journal.pone.0195308)
Supplement: S3 Table — (DOCX) [file pone.0195308.s003.docx]

**S3 Table. Background reading (OD450 in the absence of inactivated *F. tularensis*) used for calculation of LOD (CFU/mL) presented in Table 2.**

|  |  | Detector mAb | | |
| --- | --- | --- | --- | --- |
|  |  | 1A4 IgG3 HRP | 1A4 IgG1 HRP | 1A4 IgG2b HRP |
| Capture mAb | 1A4 IgG3 | 0.234 | 0.060 | 0.091 |
| 1A4 IgG1 | 0.228 | 0.052 | 0.055 |
| 1A4 IgG2b | 0.100 | 0.061 | 0.074 |
